# Supplementary material for: Gestational diabetes mellitus diagnosed at 24 to 28 weeks of gestation in older and obese Women: Is it too late?
Source: PubMed Central journal article supplement (PMC6913988; doi:10.1371/journal.pone.0225955), 2019-12-16
Supplement: pone.0225955.s001.pdf [file pone.0225955.s001.pdf]

**Table S1. Prevalence of GDM according to maternal age and BMI**

|                                         | Age <35 years<br>(n = 4927) | Age ≥35 years<br>(n = 2642) | P-value  | Total               |
|-----------------------------------------|-----------------------------|-----------------------------|----------|---------------------|
| BMI < 5 kg/m <sup>2</sup><br>(n = 7079) | 3.2 %<br>(147/4665)         | 6.8 %<br>(163/2414)         | < 0.0001 | 4.4 %<br>(310/7079) |
| BMI ≥ 25 kg/m <sup>2</sup><br>(n = 490) | 8.8 %<br>(23/262)           | 22.4 %*<br>(51/228)         | < 0.0001 | 15.1 %<br>(74/490)  |
| P-value                                 | <0.0001                     | <0.0001                     |          |                     |
| Total<br>(n = 7569)                     | 3.5 %<br>(170/4927)         | 8.1 %<br>(214/2642)         |          | 5.1 %<br>(384/7569) |

GDM, gestational diabetes mellitus; BMI, body mass index

\*P-value <0.0001 compared with Group 1 (age <35 years and BMI <25kg/m<sup>2</sup>)
